# Supplementary material for: Structural Insight into a Yeast Maltase—The BaAG2 from Blastobotrys adeninivorans with Transglycosylating Activity
Source: MDPI journal article supplement (doi:10.3390/jof7100816), 2021-09-29
Supplement: s1 [file s1]

## Article

# Structural Insight into a Yeast Maltase—The BaAG2 from *Blastobotrys adeninivorans* with Transglycosylating Activity

Karin Ernits <sup>1</sup>, Christian Kjeldsen <sup>2</sup>, Karina Persson <sup>1</sup>, Eliis Grigor <sup>3</sup>, Tiina Alamäe <sup>3</sup> and Triinu Visnapuu <sup>3,\*</sup>

<sup>1</sup> Department of Chemistry, Umeå University, 90187 Umeå, Sweden; karin.ernits@umu.se (K.E.); karina.persson@umu.se (K.P.)

<sup>2</sup> Department of Chemistry, Technical University of Denmark, DK-2800 Kgs. Lyngby, Denmark; chkje@kemi.dtu.dk

<sup>3</sup> Institute of Molecular and Cell Biology, University of Tartu, 51010 Tartu, Estonia; eliis.grigor25@gmail.com (E.G.); tiina@alamae.eu (T.A.)

\* Correspondence: triinu.visnapuu@ut.ee; Tel.: +372-7375013

**Abstract:** An early-diverged yeast, *Blastobotrys (Arxula) adeninivorans* (*Ba*), has biotechnological potential due to nutritional versatility, temperature tolerance, and production of technologically applicable enzymes. We have biochemically characterized from the *Ba* type strain (CBS 8244) the GH13-family maltase BaAG2 with efficient transglycosylation activity on maltose. In the current study, transglycosylation of sucrose was studied in detail. The chemical entities of sucrose-derived oligosaccharides were determined using nuclear magnetic resonance. Several potentially prebiotic oligosaccharides with  $\alpha$ -1,1,  $\alpha$ -1,3,  $\alpha$ -1,4, and  $\alpha$ -1,6 linkages were disclosed among the products. Trisaccharides isomelezitose, erlose, and theandrose, and disaccharides maltulose and trehalulose were dominant transglycosylation products. To date no structure for yeast maltase has been determined. Structures of the BaAG2 with acarbose and glucose in the active center were solved at 2.12 and 2.13 Å resolution, respectively. BaAG2 exhibited a catalytic domain with a ( $\beta/\alpha$ )<sub>8</sub>-barrel fold and Asp216, Glu274, and Asp348 as the catalytic triad. The fairly wide active site cleft contained water channels mediating substrate hydrolysis. Next to the substrate-binding pocket an enlarged space for potential binding of transglycosylation acceptors was identified. The involvement of a Glu (Glu309) at subsite +2 and an Arg (Arg233) at subsite +3 in substrate binding was shown for the first time for  $\alpha$ -glucosidases.

**Keywords:**  $\alpha$ -glucosidase; glycoside hydrolase; isomalto-oligosaccharides; acarbose; crystal structure; molecular replacement; nuclear magnetic resonance; erlose; isomelezitose; trehalulose

**Citation:** Ernits, K.; Kjeldsen, C.; Persson, K.; Grigor, E.; Alamäe, T.; Visnapuu, T. Structural Insight into a Yeast Maltase—The BaAG2 from *Blastobotrys adeninivorans* with Transglycosylating Activity. *J. Fungi* **2021**, *7*, 816. <https://doi.org/10.3390/jof7100816>

Academic Editors: Paul Olusegun Bankole and Dietmar Schlosser

Received: 1 September 2021

Accepted: 24 September 2021

Published: 29 September 2021

**Publisher's Note:** MDPI stays neutral with regard to jurisdictional claims in published maps and institutional affiliations.

## Supplementary Materials

Tables S1, S2, S3

Figures S1, S2, S3, S4, S5, S6, S7

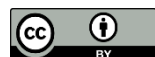

**Copyright:** © 2021 by the authors. Licensee MDPI, Basel, Switzerland. This article is an open access article distributed under the terms and conditions of the Creative Commons Attribution (CC BY) license (<http://creativecommons.org/licenses/by/4.0/>).

**Table S1.** Substrates of  $\alpha$ -glucosidases and their potential transglycosylation products. Oligosaccharides containing glucose and fructose residues, their composition and linkage types are shown. The substrates for *BaAG2* were determined in [1] and in this study. Sucrose isomers are shown in bold and sucrose moiety in trisaccharides is underlined.

| Saccharide                 | Composition and linkage type                             | Description                   | Substrate for <i>BaAG2</i> |
|----------------------------|----------------------------------------------------------|-------------------------------|----------------------------|
| Nigerose*                  | Glc- $\alpha$ 1,3-Glc                                    | Maltose-type disaccharide     | ND                         |
| Maltose*                   | Glc- $\alpha$ 1,4-Glc                                    | Maltose-type disaccharide     | +                          |
| Isomaltose*                | Glc- $\alpha$ 1,6-Glc                                    | Isomaltose-type disaccharide  | –                          |
| Trehalulose*               | <b>Glc-<math>\alpha</math>1,1-Fru</b>                    | Substrate; disaccharide       | +                          |
| Sucrose                    | Glc- $\alpha$ 1,2-Fru                                    | Substrate; disaccharide       | +                          |
| Turanose*                  | <b>Glc-<math>\alpha</math>1,3-Fru</b>                    | Maltose-type disaccharide     | +                          |
| Maltulose*                 | <b>Glc-<math>\alpha</math>1,4-Fru</b>                    | Maltose-type disaccharide     | +                          |
| Isomaltulose (palatinose)* | <b>Glc-<math>\alpha</math>1,6-Fru</b>                    | Isomaltose-type disaccharide  | –                          |
| Maltotriose                | Glc- $\alpha$ 1,4-Glc- $\alpha$ 1,4-Glc                  | Maltose-type trisaccharide    | +                          |
| Panose                     | Glc- $\alpha$ 1,6-Glc- $\alpha$ 1,4-Glc                  | Mixed-type trisaccharide      | –                          |
| Esculose*                  | Glc- $\alpha$ 1,3- <u>Glc-<math>\alpha</math>1,2-Fru</u> | Maltose-type trisaccharide    | ND                         |
| Erlose*                    | Glc- $\alpha$ 1,4- <u>Glc-<math>\alpha</math>1,2-Fru</u> | Maltose-type trisaccharide    | +                          |
| Theanderose*               | Glc- $\alpha$ 1,6- <u>Glc-<math>\alpha</math>1,2-Fru</u> | Isomaltose-type trisaccharide | ND                         |
| Melezitose*                | Glc- $\alpha$ 1,3- <u>Fru-<math>\beta</math>2,1-Glc</u>  | Maltose-type trisaccharide    | +                          |
| Isomelezitose*             | Glc- $\alpha$ 1,6- <u>Fru-<math>\beta</math>2,1-Glc</u>  | Isomaltose-type trisaccharide | +                          |

Glc — glucose; Fru — fructose; + hydrolysed by *BaAG2*; – not a substrate for *BaAG2*; ND — not determined.

\* Products of *BaAG2* detected in this study by NMR from transglycosylation reaction on sucrose

**Table S2.** Data collection and refinement statistics of *BaAG2* structure determination.

|                                                     | <i>BaAG2</i> + acarbose | <i>BaAG2</i> + glucose  |
|-----------------------------------------------------|-------------------------|-------------------------|
| PDB ID                                              | 7P01                    | 7P07                    |
| <b>Data collection</b>                              |                         |                         |
| Space group                                         | P 1 21 1                | P 1 21 1                |
| Cell dimensions                                     |                         |                         |
| <i>a</i> , <i>b</i> , <i>c</i> (Å)                  | 68.03 78.08 121.93      | 66.88 77.73 121.11      |
| $\alpha$ , $\beta$ , $\gamma$ (°)                   | 90 94.1 90              | 90 92.9 90              |
| Resolution (Å)                                      | 48.14-2.12 (2.18-2.12)* | 47.73-2.13 (2.19-2.13)* |
| <i>R</i> <sub>merge</sub>                           | 0.023 (1.152)           | 0.097 (1.204)           |
| <i>I</i> / $\sigma$ <i>I</i>                        | 7.68 (1.54)             | 8.61 (1.19)             |
| Completeness (%)                                    | 98.9 (100.0)            | 98.9 (99.8)             |
| Redundancy                                          | 3.55 (3.55)             | 3.55 (3.58)             |
| <b>Refinement</b>                                   |                         |                         |
| Resolution (Å)                                      | 48.14-2.12              | 47.73-2.13              |
| No. reflections                                     | 72345                   | 69408                   |
| <i>R</i> <sub>work</sub> / <i>R</i> <sub>free</sub> | 0.1842 / 0.1952         | 0.2150 / 0.2318         |
| No. non-hydrogen atoms                              | 10177                   | 9770                    |
| Protein                                             | 9345                    | 9355                    |
| Ligand/ion                                          | 155                     | 40                      |
| Water                                               | 677                     | 375                     |
| <i>B</i> -factors                                   | 44.6                    | 53.6                    |
| Protein                                             | 44.9                    | 52.5                    |
| Ligand/ion                                          | 46.1                    | 53.0                    |
| Water                                               | 40.1                    | 80.2                    |
| R.m.s. deviations                                   |                         |                         |
| Bond lengths (Å)                                    | 0.019                   | 0.017                   |
| Bond angles (°)                                     | 1.89                    | 1.89                    |

\* Statistics for the highest-resolution shell is shown in parentheses.

**Table S3.** NMR assignment of Glc- $\alpha$ 1,1-Fru- $\beta$ 2,1-Glc.

| Signal/Position    | 1           | 2      | 3      | 4     | 5     | 6           |
|--------------------|-------------|--------|--------|-------|-------|-------------|
| $\alpha$ -Glc-1,1- |             |        |        |       |       |             |
| 1H                 | 4.953       | 3.488  | 3.683  | 3.371 | 3.596 | 3.709/3.732 |
| 13C                | 98.49       | 71.29  | 72.85  | 69.42 | 72.24 | 60.11       |
| $\alpha$ -Glc-1,2- |             |        |        |       |       |             |
| 1H                 | 5.371       | 3.479  | 3.670  | 3.379 | 3.772 | 3.713/3.778 |
| 13C                | 92.54       | 71.024 | 72.548 | 69.23 | 72.31 | 60.48       |
| $\beta$ -Fru-2,1-  |             |        |        |       |       |             |
| 1H                 | 3.607/3.816 | -      | 4.210  | 3.989 | 3.861 | 3.747       |
| 13C                | 65.99       | 103.58 | 76.46  | 73.68 | 81.24 | 62.16       |

**Figure S1.** Clustal Omega alignment of *BaAG2* homologues from strains of three *Blastobotrys* (*Arx-ula*) sp. *BaAG2\_CBS 8244*, a maltase from the *Ba* type strain which is a source of the *BaAG2* in the current work and our earlier studies [1,2]. *BaAG2\_TMCC 7007*, a putative maltase of a *Ba* strain isolated from fermented Pu-erh tea [3]; *BaAG2\_LS3*, a putative maltase of the first strain of *Blastobotrys* sp. with sequenced genome [4] that is currently allocated to *Blastobotrys raffinosifer-mentans* [5]. Amino acids constituting the catalytic triad are shown by cyan background and those interacting with substrate at -1, +1, +2 and +3 subsites are marked using grey background. Clustal consensus is marked below the sequence indicating conservation — \* positions with fully conserved residue; : positions with residues of strongly similar properties; . positions with residues of weakly similar properties.

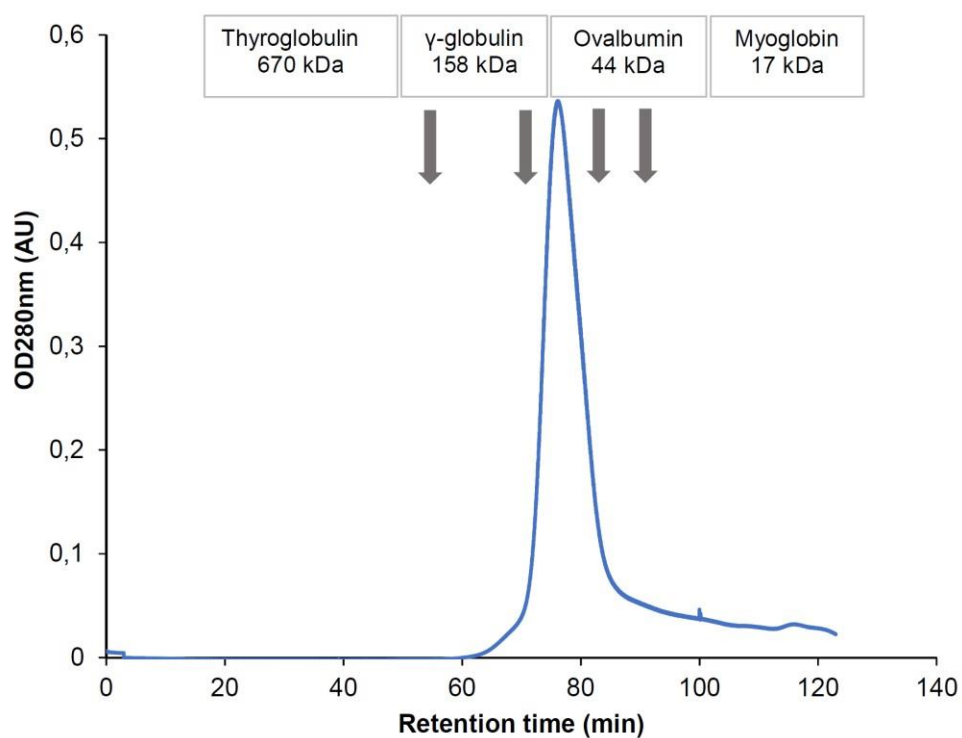

**Figure S2.** The chromatogram of size-exclusion chromatography of *BaAG2*. The chromatography was performed on Hiload 16/60 Superdex 200 pg column (GE Healthcare, Uppsala, Sweden) as shown in chapter 2.1. in the main text. Gel filtration standard from Bio-Rad (Hercules, CA, USA) was used for calibration. The reference proteins with their molecular weights are shown and respective retention times are indicated by arrows. According to the calibration curve, the peak maximum of *BaAG2* corresponds to 75.7 kDa.

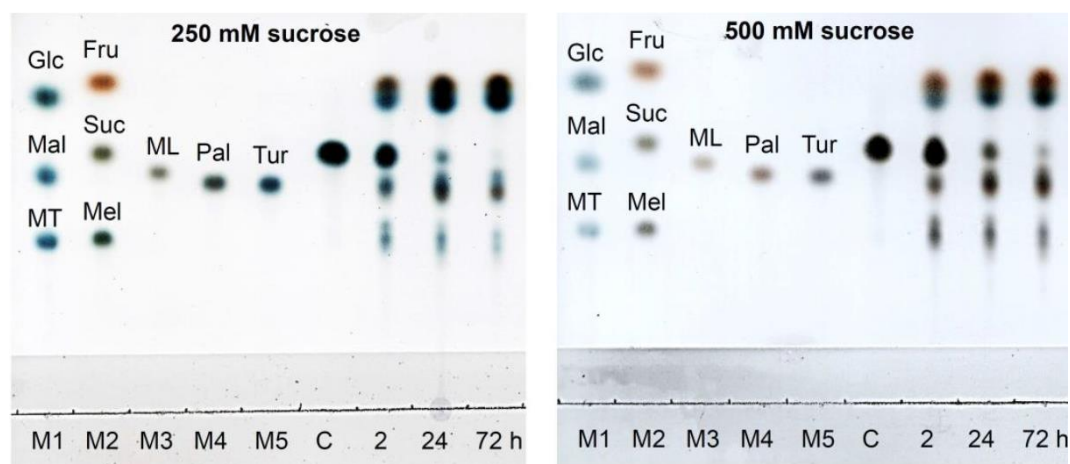

**Figure S3.** TLC analysis of transglycosylation on 250 mM or 500 mM sucrose by *BaAG2*. The results on quantification of saccharides by HPLC is shown on Figure 2 in the main text. The final concentration of the enzyme in the reaction mixture was 20 µg/mL. The reactions were carried out at 30 °C up to 72 h as shown in chapter 2.4. in the main text. Samples were 5 times diluted in mQ water before applying to TLC plates in 0.5 µL spots. The sugars were separated by TLC and visualized as shown in chapter 2.6. in the main text. Marker sugars were analysed as references. M1: Glc – glucose (30 mM), Mal – maltose (10 mM), MT – maltotriose (10 mM); M2: Fru – fructose (30 mM), Suc – sucrose (10 mM), Mel – melezitose (10 mM); M3: ML – maltulose (10 mM); M4: Pal – palatinose (isomaltulose, 10 mM); M5: Tur – turanose (10 mM). C – Control without enzyme but with 0.5% BSA and substrate (sucrose) incubated 72 h alongside to the samples. The compositions of reference sugars are shown in Table S1.

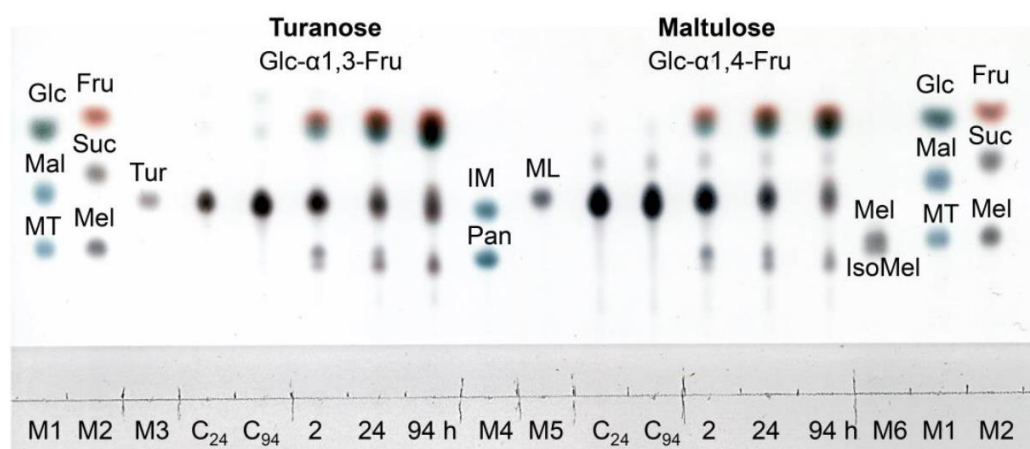

**Figure S4.** Transglycosylation assay of 500 mM turanose and maltulose by *BaAG2*. The final concentration of the enzyme was 20 µg/mL. The reactions were carried out at 30 °C up to 94 h similarly as shown in chapter 2.4. in the main text. Samples were 5 times diluted in mQ water before applying to TLC plates in 0.5 µL spots. The sugars were separated by TLC and visualized as shown in chapter 2.6. in the main text. M1: Glc – glucose (30 mM), Mal – maltose (10 mM), MT – maltotriose (10 mM); M2: Fru – fructose (30 mM), Suc – sucrose (10 mM), Mel – melezitose (10 mM); M3: Tur – turanose (10 mM); M4: IM – isomaltose (10 mM), Pan – panose (10 mM); M5: ML – maltulose (10 mM); M6: Mel – melezitose (10 mM), IsoMel – isomelezitose (*OpMAL1* DP 3 product); C<sub>24</sub> and C<sub>94</sub> – Control without enzyme but with 0.5% BSA and substrate (turanose or maltulose) incubated alongside to the transglycosylation samples up to 24 h and 94 h, respectively. The compositions of reference sugars are shown in Table S1

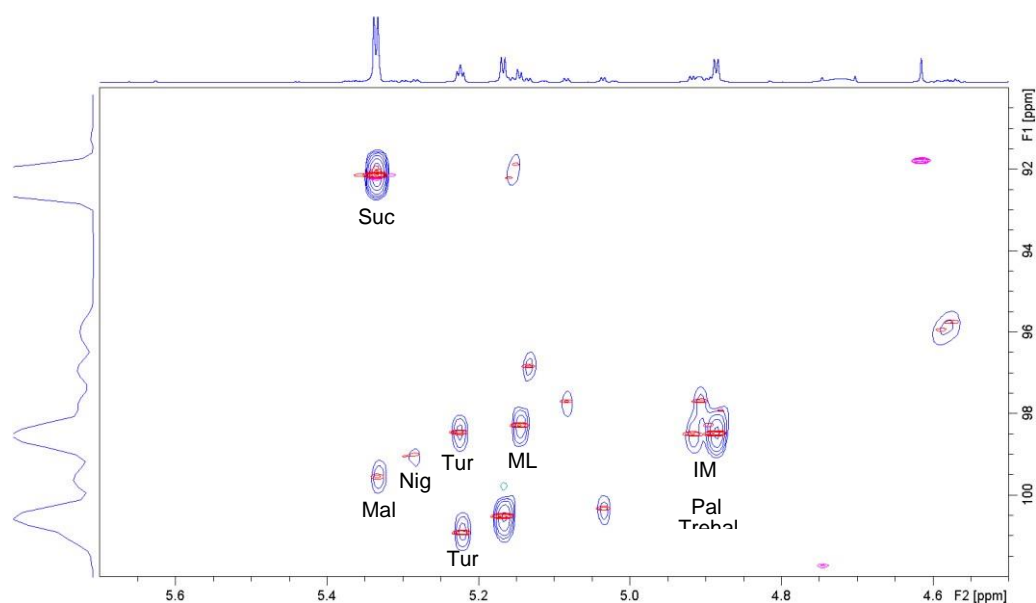

**Figure S5.** HSQC spectrum of the anomeric region (blue) overlaid with narrow HSQC (red) of the DP 2 sample prepared using 500 mM sucrose as substrate. The NMR spectra were recorded as shown in chapter 2.5. and analysed as described in chapter 3.4. in the main text. The <sup>1</sup>H projection is from a separate experiment. The labels of non-reducing anomeric signals are as follows: Suc – sucrose, Mal – maltose, Nig – nigerose; Tur – turanose, ML – maltulose, IM – isomaltose, Pal – palatinose (isomaltulose), Trehal – trehalulose. The compositions of sugars are shown in Table S1.

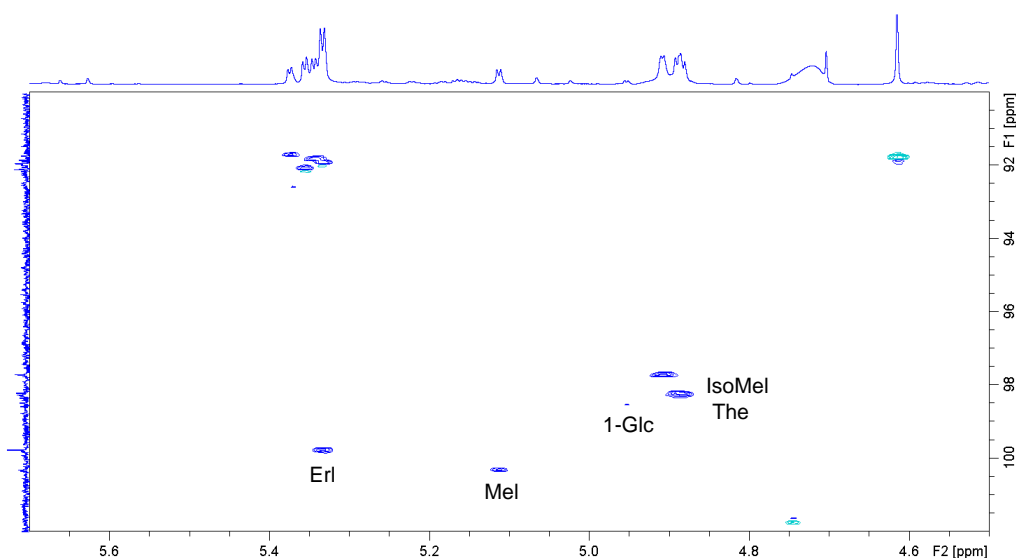

**Figure S6.** Narrow HSQC spectrum of the DP 3 sample prepared using 500 mM sucrose as substrate. The NMR spectra were recorded as shown in chapter 2.5. and analysed as described in chapter 3.4. in the main text. The <sup>1</sup>H and <sup>13</sup>C projections are from separate experiments. The labels are of non-reducing anomeric signals not arising from sucrose (Glc- $\alpha$ 1,2 $\beta$ -Fru), and are ordered by descending <sup>1</sup>H chemical shift as follows: Erl – erlose, Mel – melezitose, 1-Glc – 1-O<sup>F</sup>-glycosyl-sucrose, IsoMel – isomelezitose, The – theandrose.



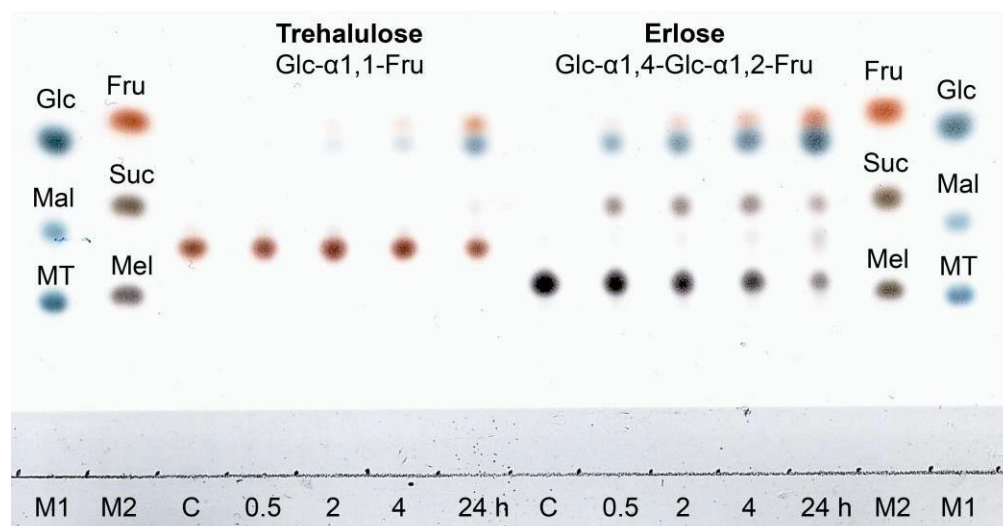

**Figure S7.** TLC analysis of *BaAG2* reaction products from 50 mM trehalulose and erlose. The final concentration of the enzyme was 3 µg/mL in the reaction mixture. The reactions were carried out at 30 °C up to 24 h similarly as in chapter 2.4. in the main text. Samples were 2 times diluted in mQ water before applying to TLC plates in 0.5 µL spots. The sugars were separated and visualized as shown in chapter 2.6. in the main text. M1: Glc – glucose (30 mM), Mal – maltose (10 mM), MT – maltotriose (10 mM); M2: Fru – fructose (30 mM), Suc – sucrose (10 mM), Mel – melezitose (10 mM); C – Control without enzyme but with 0.5% BSA and substrate (trehalulose or erlose, respectively) incubated 24 h alongside to the samples.

## References

1. Visnapuu, T.; Meldre, A.; Põšnograjeva, K.; Viigand, K.; Ernits, K.; Alamäe, T. Characterization of a Maltase from an Early-Diverged Non-Conventional Yeast *Blastobotrys adeninivorans*. *Int. J. Mol. Sci.* **2020**, *21*, 297, doi:10.3390/ijms21010297.
2. Viigand, K.; Põšnograjeva, K.; Visnapuu, T.; Alamäe, T. Genome Mining of Non-Conventional Yeasts: Search and Analysis of MAL Clusters and Proteins. *Genes* **2018**, *9*, 354, https://doi.org/10.3390/genes9070354.
3. Tian, F.; Shi, J.; Li, Y.; Gao, H.; Chang, L.; Zhang, Y.; Gao, L.; Xu, P.; Tang, S. Proteogenomics Study of *Blastobotrys adeninivorans* TMCC 70007-A Dominant Yeast in the Fermentation Process of Pu-Erh Tea. *J. Proteome Res.* **2021**, *20*, 3290–3304, doi:10.1021/acs.jproteome.1c00205.
4. Kunze, G.; Gaillardin, C.; Czernicka, M.; Durrens, P.; Martin, T.; Böer, E.; Gabaldón, T.; Cruz, J.A.; Talla, E.; Marck, C.; et al. The Complete Genome of *Blastobotrys (Arxula) adeninivorans* LS3 - a Yeast of Biotechnological Interest. *Biotechnol. Biofuels* **2014**, *7*, 66, doi:10.1186/1754-6834-7-66.
5. Thomas, S.; Sanya, D.R.A.; Fouchard, F.; Nguyen, H.-V.; Kunze, G.; Neuveglise, C.; Crutz-Le Coq, A.-M. *Blastobotrys adeninivorans* and *B. raffinosofermentans*, Two Sibling Yeast Species Which Accumulate Lipids at Elevated Temperatures and from Diverse Sugars. *Biotechnol. Biofuels* **2019**, *12*, 154, doi:10.1186/s13068-019-1492-x.
